# Supplementary material for: The CLE53–SUNN genetic pathway negatively regulates arbuscular mycorrhiza root colonization in Medicago truncatula
Source: PubMed Central journal article supplement (PMC7410177; doi:10.1093/jxb/eraa193), 2020-04-20

## Supplementary figure legends

**Fig. S1.** (A,B) Transcript abundances of the AMF marker genes *MtPT4* (plant) and  *$\alpha$ -TUBULIN* (fungus) in wild-type and *sunn*. Marks are averages  $\pm$  standard errors (n=3). There were no significant differences in transcript levels between wild-type and *sunn* at any time point based on two-way ANOVA ( $p < 0.05$ ). (C) Representative pictures of colonized roots of wild-type, *sunn* and *rdn1* at the four different time-points (days post inoculation (dpi)).

**Fig. S2.** Arbuscule and vesicle intensity in colonized roots of wild-type, *sunn* and *rdn1*. Number of vesicles (A) and arbuscules (B) were counted within a predefined square of 0.08 mm<sup>2</sup> in individual root segments of four biological replicates in wild-type, *sunn* and *rdn1* at three different time points (days post inoculation (dpi)). 100 observations were made per replicate. Bars are averages + standard errors (n = 100). Different letters indicate significant differences within genotypes at each time point as calculated by one-way ANOVA followed by Tukey's posthoc test ( $p < 0.05$ ).

**Fig. S3.** Gene expression analyses and phosphate contents. (A) Relative gene expression levels of *PHOSPHATE STARVATION INDUCED* (*MtPSI*) and *MtPT4* at sufficient phosphorus (High P), phosphorus deficiency (Low P) and Low P plants colonized with arbuscular mycorrhiza (AMF). Expression levels were analyzed with RT-qPCR using the delta-delta Ct method (n=4). (B) Shoot phosphate (Pi) content (mg plant<sup>-1</sup>) measured using the Malachite-green assay (n = 3). (C) Total root length colonization by arbuscules in wild-type and *mtpt4* plants derived from (Watts-Williams *et al.*, 2015) (n = 3). (D,E) Gene expression levels of *MtCLE53* and *MtPSI* in Low P roots re-supplied or not with Pi for 48 hours and 72 hours (n = 4). (F) Shoot Pi content (mg plant<sup>-1</sup>) in Low P plants re-supplied with Pi or not for 48 hours and 72 hours (n = 4). (G) *MtCLE53* expression levels in composite plants overexpressing *p35S::CLE53*, *p35S::DsRed* or a mutated version of *MtCLE53* where the prolines in positions four and seven were modified to glycines *p35S::CLE53 $\Delta$ Pro4,7* (n = 4). Statistically significant differences were calculated based on one-way ANOVA followed by Tukey's posthoc test ( $p < 0.05$ ) and are marked with letters, while significant differences calculated based on two-sided Student's t-test ( $p < 0.05$ ) are marked with an asterisk (\*). Non-significant differences are denoted "ns".

**Fig. S4.** KEGG pathway analysis. Enriched pathways were identified among all DEGs in roots of wild-type and *sunn*, and are marked with an X to indicate in which genotype they were enriched. Gene ratios, i.e. number of enriched DEGs divided by the total number of genes associated with a given pathway, were calculated for pathways enriched in at least one genotype. Circle sizes refer to the number of DEGs enriched in the individual pathways.

Figure S1

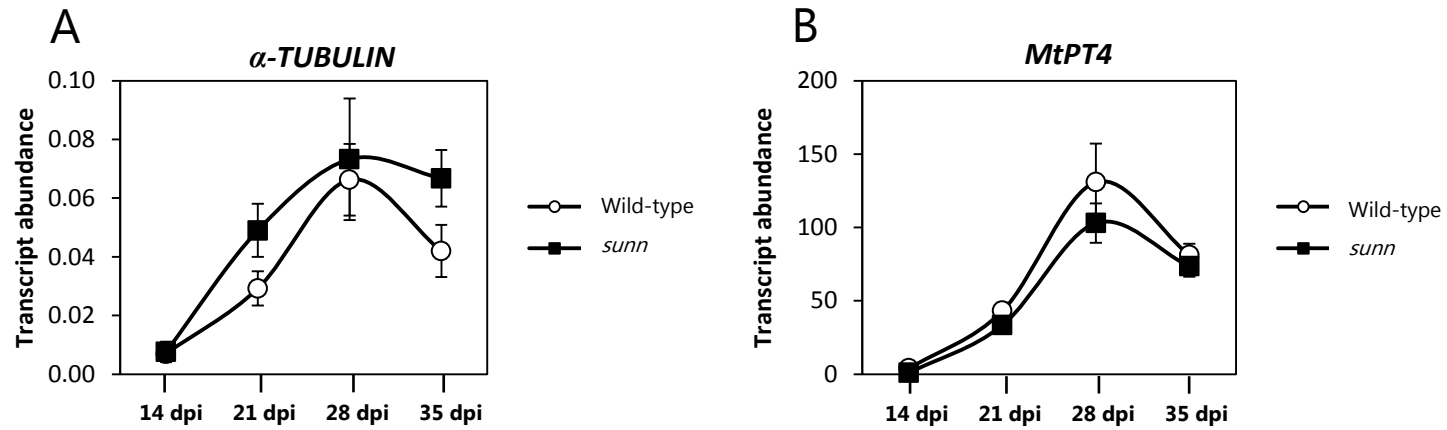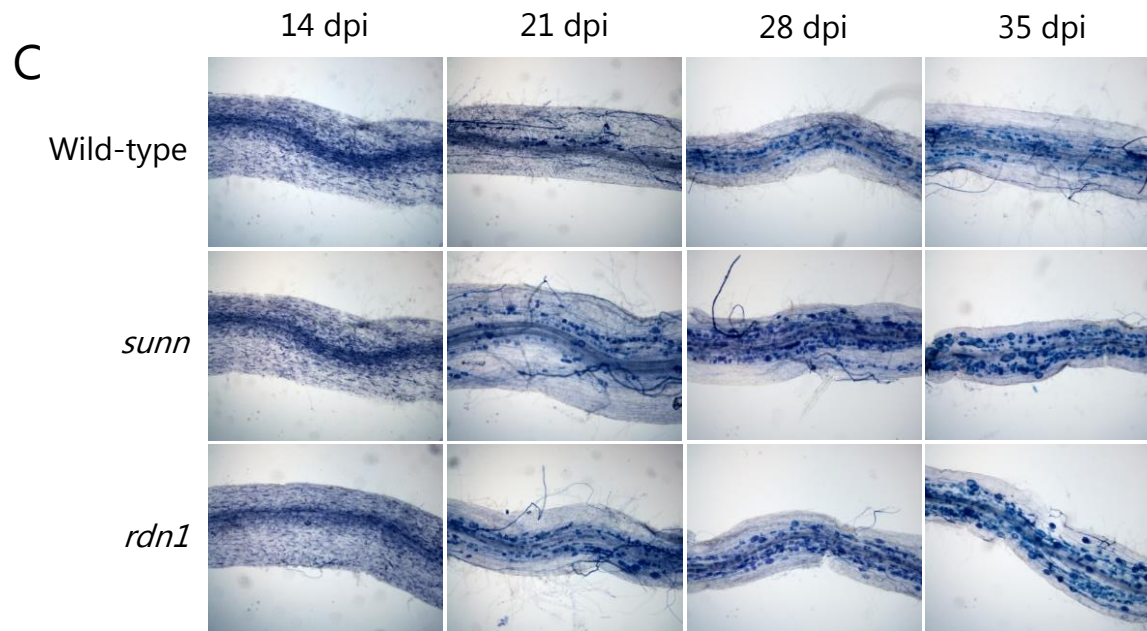

Figure S2

A

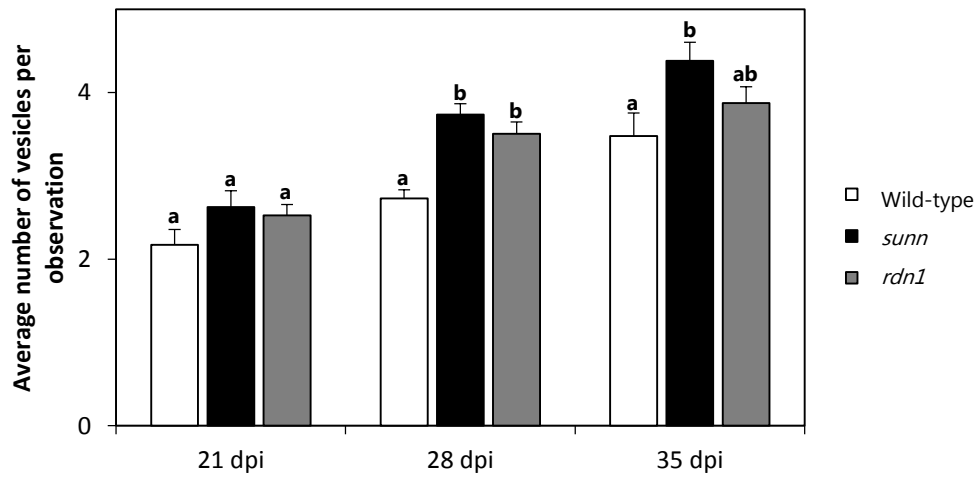

B

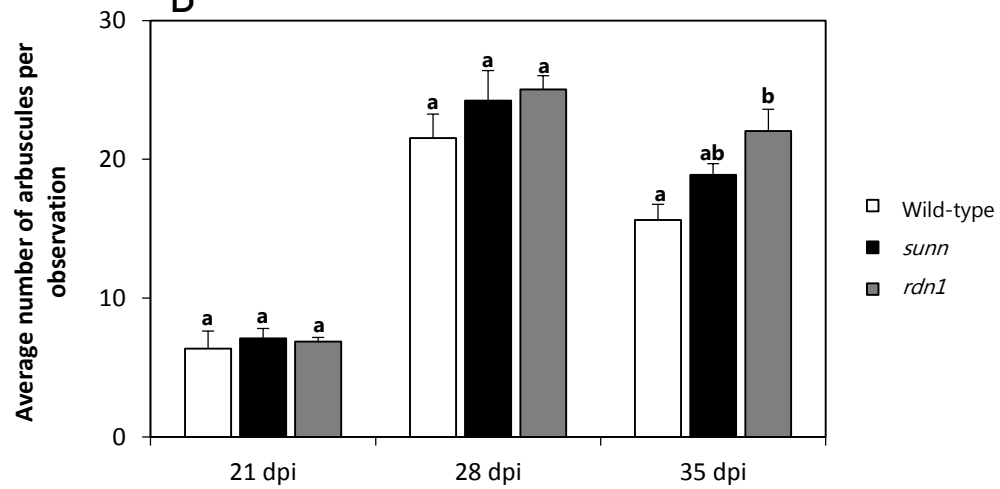

Figure S3

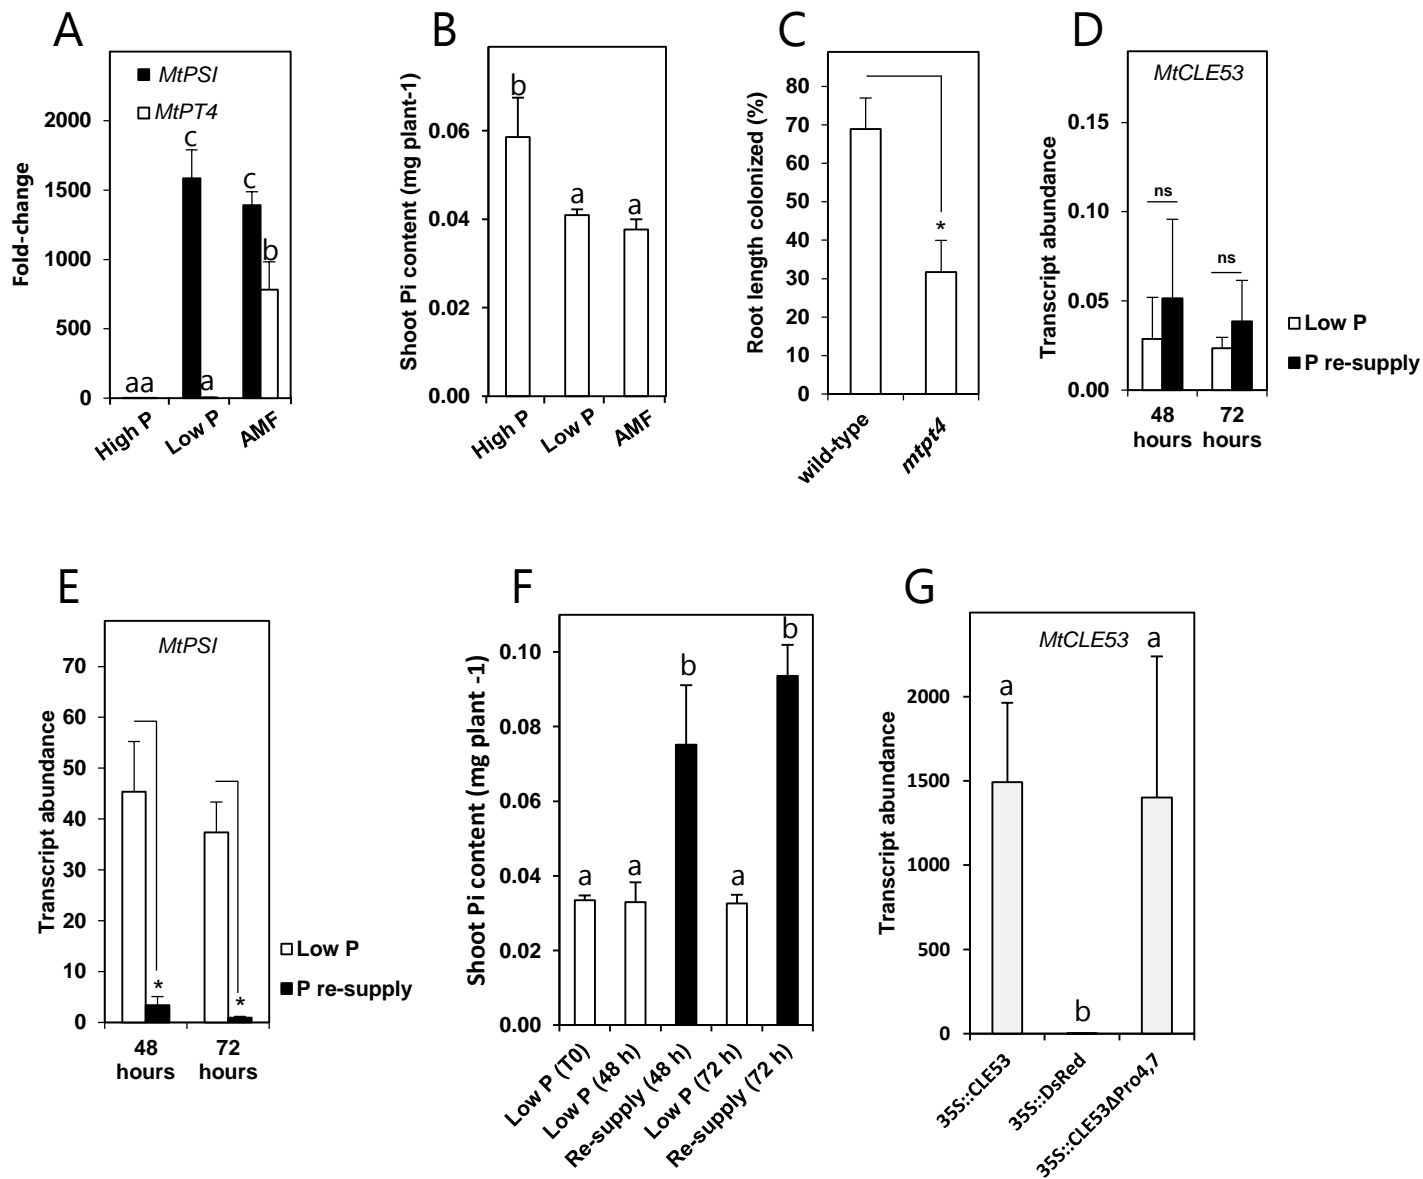

Figure S4

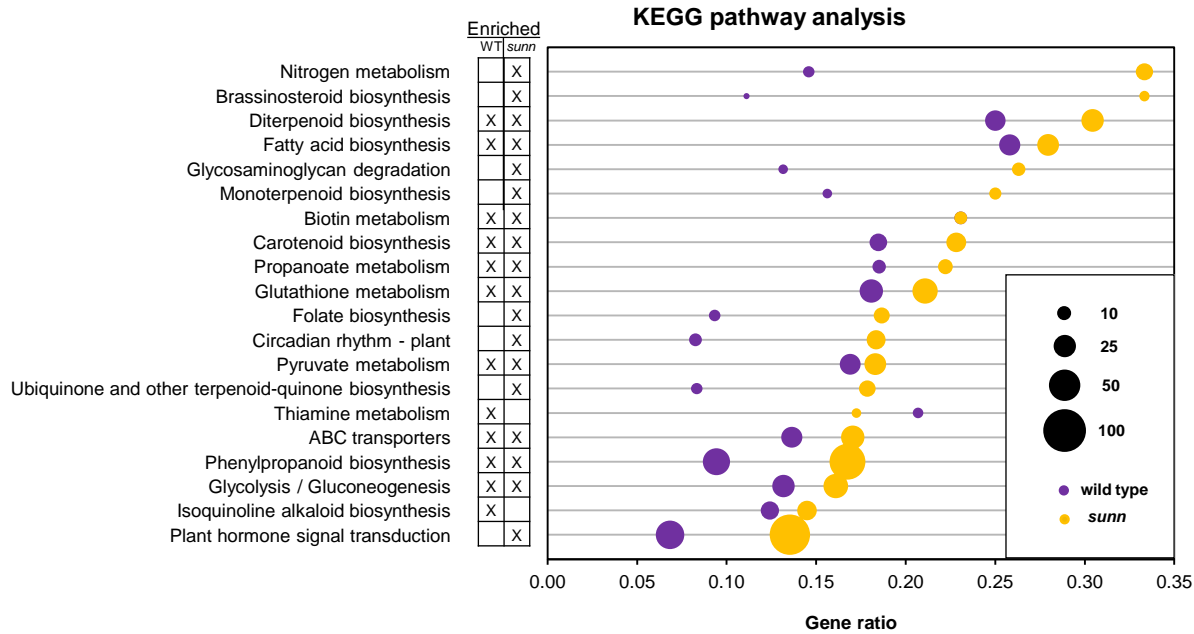

Supplement: eraa193_suppl_supplementary_figures.pdf [file eraa193_suppl_supplementary_figures.pdf]
